# Supplementary material for: Analysis of the Circulating Metabolome of Patients with Cutaneous, Mucosal and Uveal Melanoma Reveals Distinct Metabolic Profiles with Implications for Response to Immunotherapy
Source: Preprints.org preprint supplement (doi:10.20944/preprints202305.2226.v1), 2023-05-31
Supplement: Supplementary file 2 [file supplementary]

**Supplementary Material**


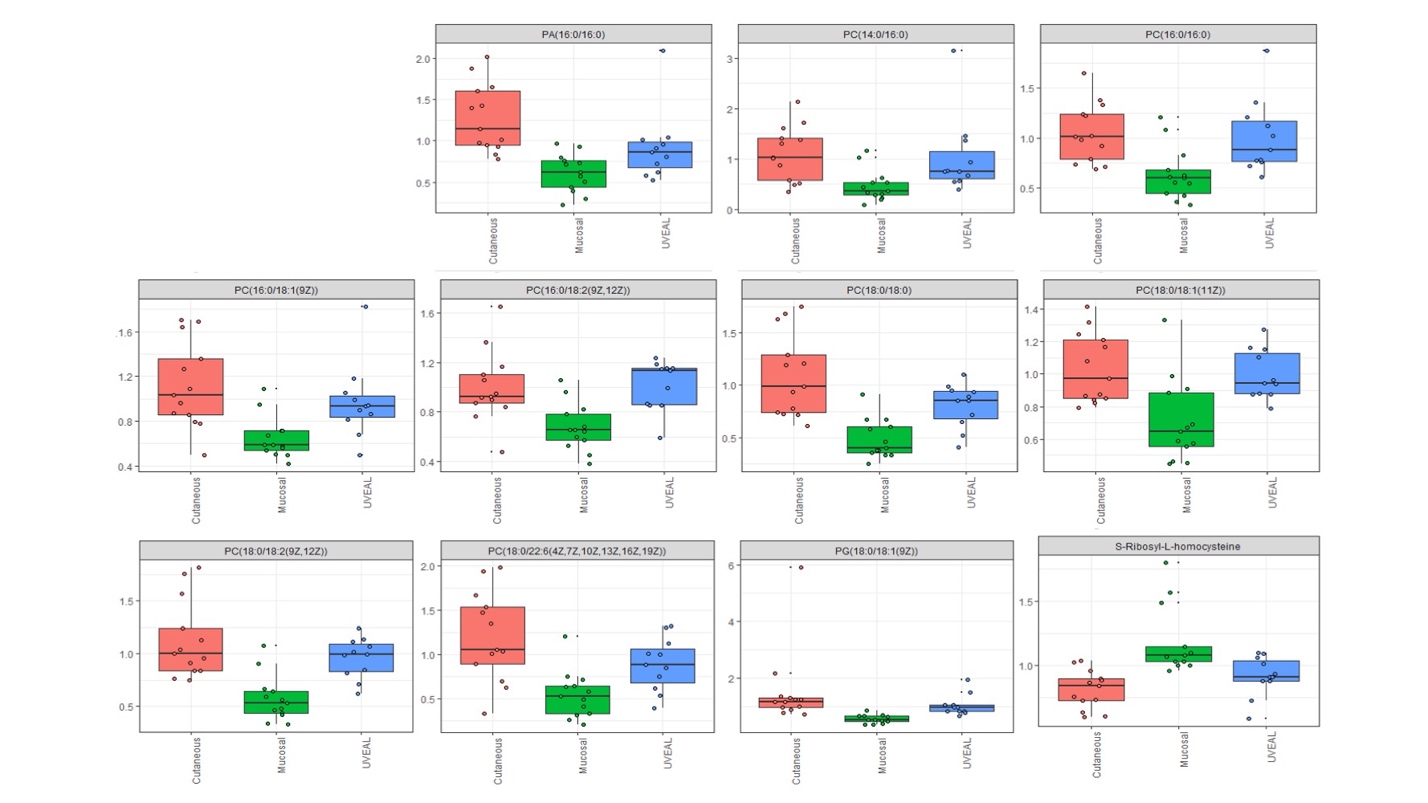


**Figure S1:** Characterization of phosphatidic acid (PA), phosphatidylcholine (PC), glycerophospholipid  (PG), and s-ribosyl-l-homocysteine according to the melanoma subtypes.


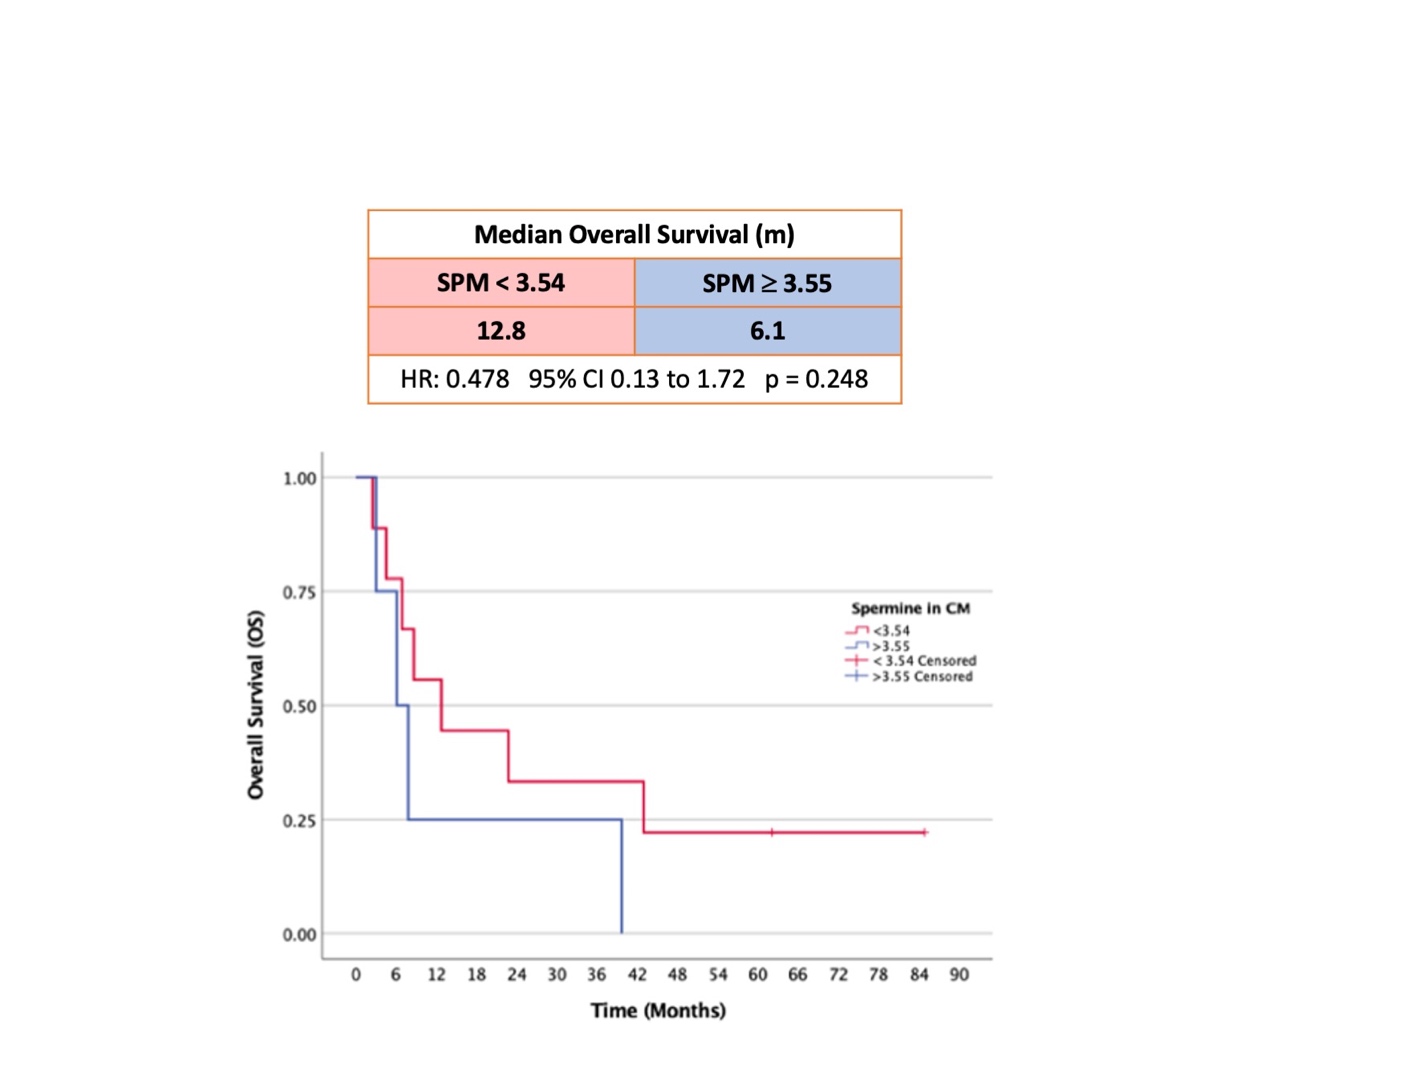


**Figure S2:** Overall survival of cutaneous melanoma patients according to SPM levels. SPM cut-off point used for analysis was in the 70th percentile.
